# Supplementary material
Source: MDPI journal article supplement (https://www.mdpi.com/2624-795X/4/4/29)
Supplement: s1 [file s1]

## SUPPLEMENTAL INFORMATION

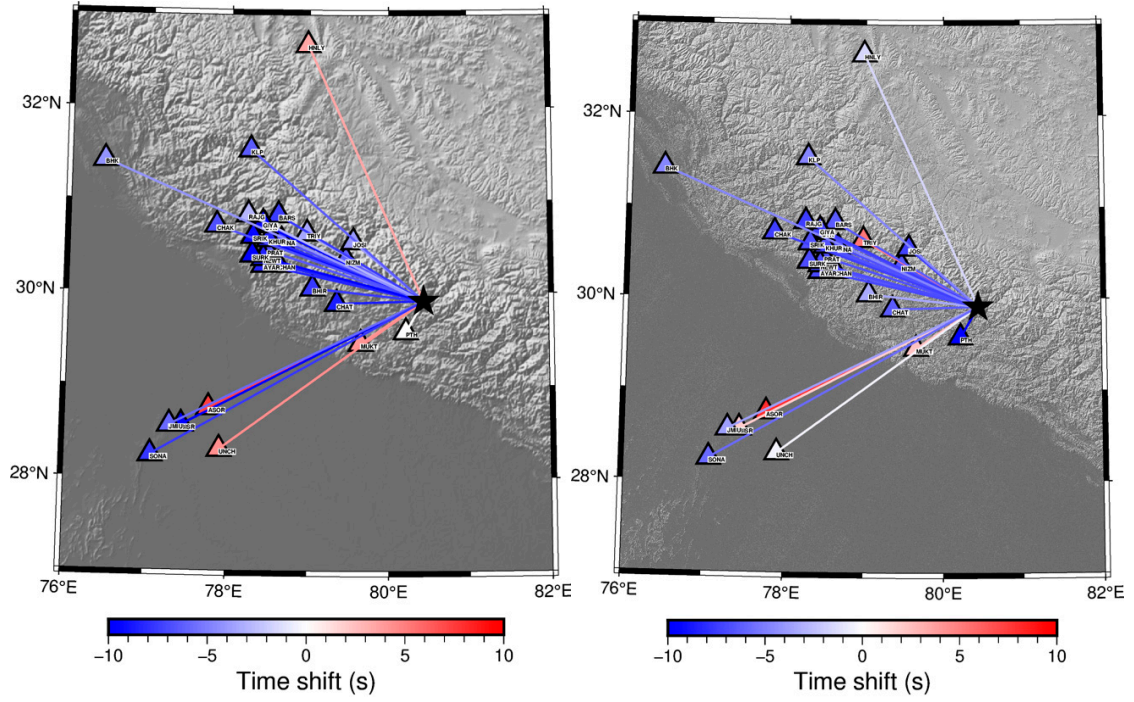

*Figure S1. Map of the time shifts between observed data and synthetics for, (a) vertical and radial component of Rayleigh wave and (b) Transverse component of Love wave at each of the stations (inverted triangle).*

### 1945 Nanda Devi Earthquake

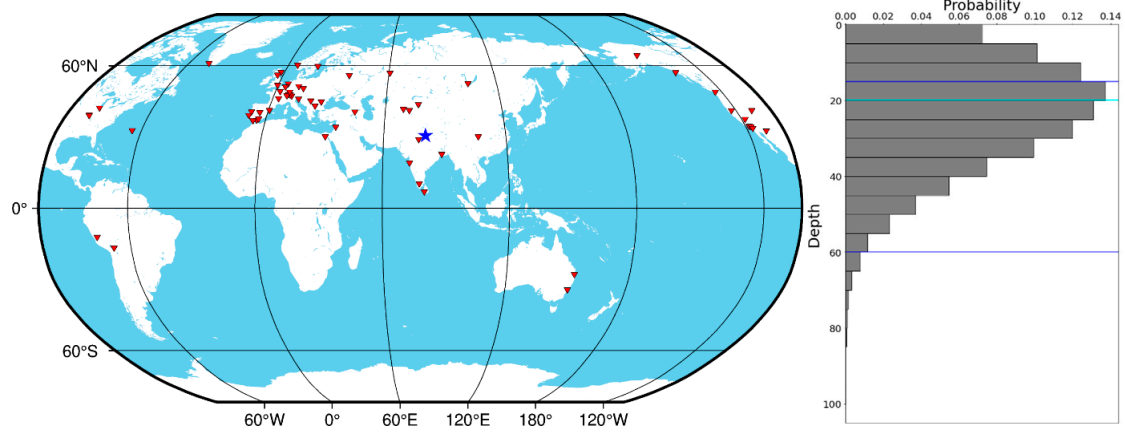

Figure S2: Stations used for non-linear location inversion of 1945 Nanda Devi event. Also shows the depth distribution of *posterior* samples. Marked in cyan is the maximum likelihood depth and marked in blue are the depths from previously published sources.

### 1958 Dharchula earthquake

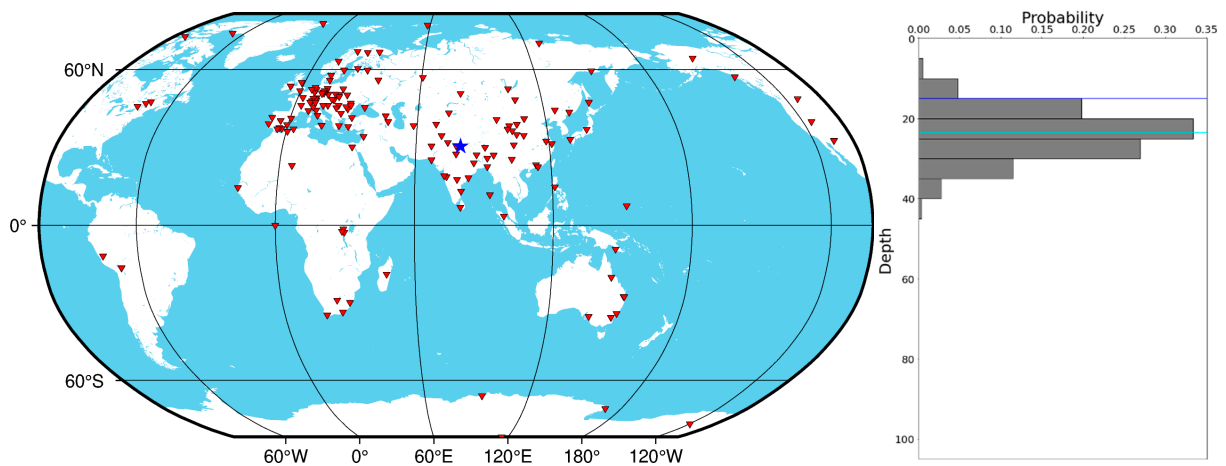

Figure S3: Stations used for non-linear location inversion of 1958 Kapkote event. Also shows the depth distribution of *posterior* samples. Marked in cyan is the maximum likelihood depth and marked in blue are the depths from previously published sources.
